# Supplementary material for: Association of CD209 (DC-SIGN) rs735240 SNV with paucibacillary leprosy in the Brazilian population and its functional effects
Source: PubMed Central journal article supplement (PMC9190517; doi:10.1590/0074-02760220014), 2022-06-10
Supplement: 1678-8060-mioc-117-e220014-s.pdf [file 1678-8060-mioc-117-e220014-s.pdf]

TABLE I  
 Characteristics of leprosy patients enrolled in the study of mRNA expression  
 in skin lesions (n = 28)

| Characteristics     | Categories | Genotype for rs735240 SNP |             |
|---------------------|------------|---------------------------|-------------|
|                     |            | AA/AG (n = 19)            | GG (n = 9)  |
| Age (mean ± SD)     |            | 41.8 ± 10.6               | 41.2 ± 13.4 |
| Sex (n/%)           | Male       | 14 (73.7%)                | 4 (44.4%)   |
|                     | Female     | 5 (26.3%)                 | 5 (55.6%)   |
| Clinical form (n/%) | MB         | 9 (47.4%)                 | 5 (55.6%)   |
|                     | PB         | 10 (52.6%)                | 4 (44.4%)   |

MB: multibacillary; PB: paucibacillary; SD: standard deviation.

TABLE II  
 Characteristics of leprosy patients enrolled in the study of DC-SIGN expression and  
 production of cytokines in cultures of monocyte-derived dendritic cells stimulated  
 with *Mycobacterium leprae* antigens (n = 14)

| Characteristics     | Categories | Genotype for rs735240 SNP |             |
|---------------------|------------|---------------------------|-------------|
|                     |            | AA/AG (n = 12)            | GG (n = 2)  |
| Age (mean ± SD)     |            | 45.8 ± 15.7               | 42.5 ± 30.4 |
| Sex (n/%)           | Male       | 9 (75.0%)                 | 2 (100.0%)  |
|                     | Female     | 3 (25.0%)                 | 0 (0.0%)    |
| Clinical form (n/%) | MB         | 8 (66.7%)                 | 1 (50.0%)   |
|                     | PB         | 4 (33.3%)                 | 1 (50.0%)   |

MB: multibacillary; PB: paucibacillary; SD: standard deviation.
